# Supplementary material
Source: publisher figshare collection journal article supplement (https://acs.figshare.com/ndownloader/files/26355391)
Supplement: Supplementary file 1 [file 26355391]

## Highlights

- A template sacrificing strategy was employed using ZIF-67 as a precursor for hCoMo-LDH synthesis.
- The prepared hCoMo-LDH nanopolyhedra possesses hierarchical architectures with multivalent active metal ions and multichannel layered structure.
- The electrode exhibits the ultralow detection limit ( $0.01\ \mu\text{M}$ ) and striking sensitivity ( $1020\ \mu\text{A}\cdot\text{mM}^{-1}\cdot\text{cm}^{-2}$ ).
- The electrode demonstrates strong anti-interference property and good suitability in real water sample.
